# Supplementary material for: Graphene Oxide from Graphite of Spent Batteries as Support of Nanocatalysts for Fuel Hydrogen Production
Source: MDPI journal article supplement (doi:10.3390/pr11113250), 2023-11-19
Supplement: s1 [file s1]

# **Graphene Oxide from Graphite of Spent Batteries as Support of Nanocatalysts for Fuel Hydrogen Production**

**Gabriel Sperandio, Iterlandes Machado Junior, Esteefany Bernardo and Renata Moreira \***

Departament of Chemistry, Campus Universitário, Universidade Federal de Viçosa, Av.  
Peter Henry Holfs, s/n, Viçosa 36570-900, Brazil

\* Correspondence: [renata.plopes@ufv.br](mailto:renata.plopes@ufv.br); Tel.: +55-31-3612-6676

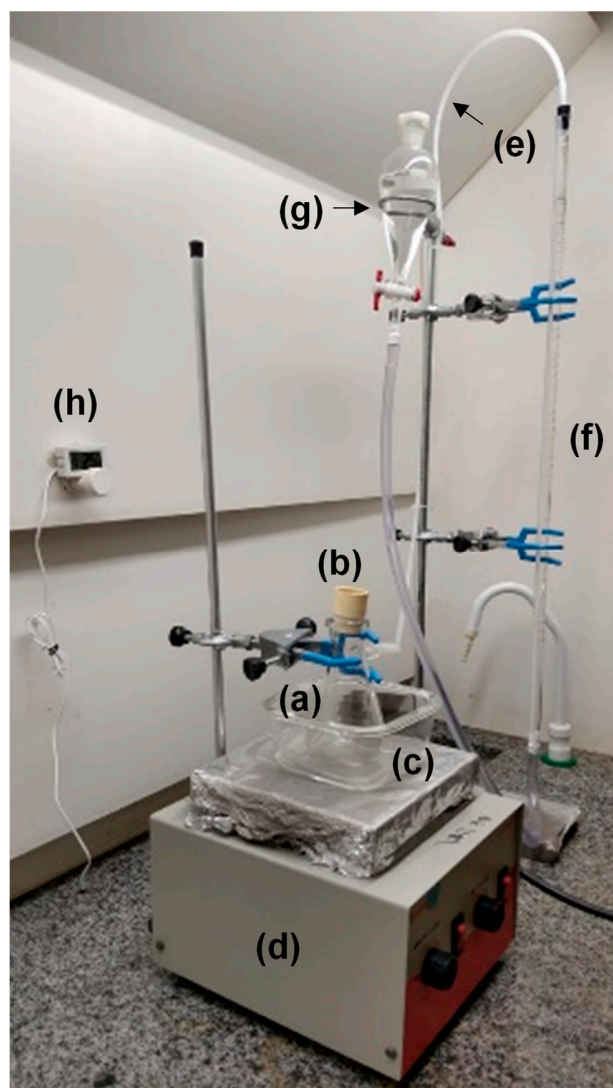

Figure S1. Hydrogen production reactor. Highlights: (a) Kitassato-type reactor. (b) rubber septum for sealing the system and injecting the  $\text{NaBH}_4$  solution. (c) bath for temperature control. (d) magnetic stirrer with heating. (e) plastic hose connection between the reactor and the volume measurement system. (f) burette-type volume meter attached to the system to measure the volume of hydrogen gas produced. (g) water reservoir for water leveling in the volume measurement system. (h) digital thermometer.

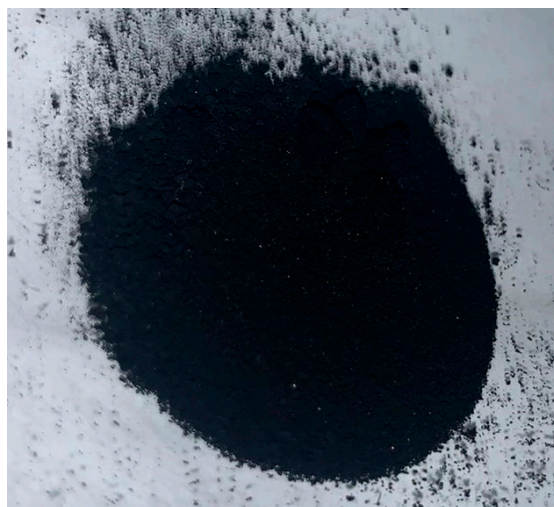

Figure S2. Graphene oxide produced from the rods of used Zn-C batteries.

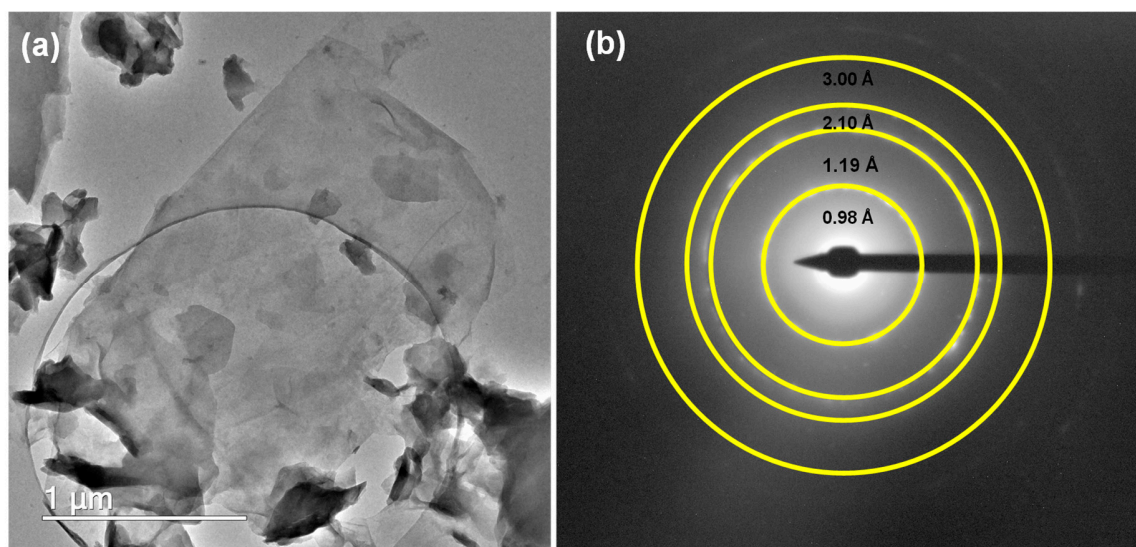

Figure S3. (a) Transmission Electron Microscopy (TEM) image of graphene oxide (GO) obtained from spent Zn-C batteries. (b) Selected-Area Electron Diffraction (SAED). Polycrystalline structure characterized by the main interplanar distances: 0.98 Å; 1.19 Å; 2.10 Å; 3.00 Å.

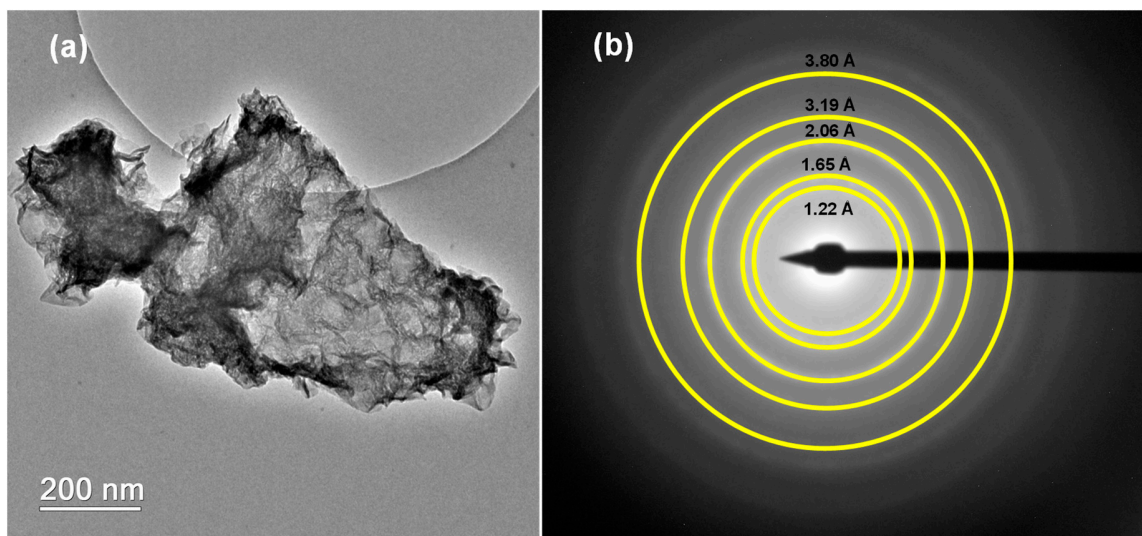

Figure S4. (a) Transmission Electron Microscopy image of Ni/Co-NPs-GO. (b) Selected-Area Electron Diffraction (SAED). Polycrystalline structure characterized by the main interplanar distances: 1.22 Å; 1.65 Å; 2.06 Å; 3.19 Å; 3.80 Å.

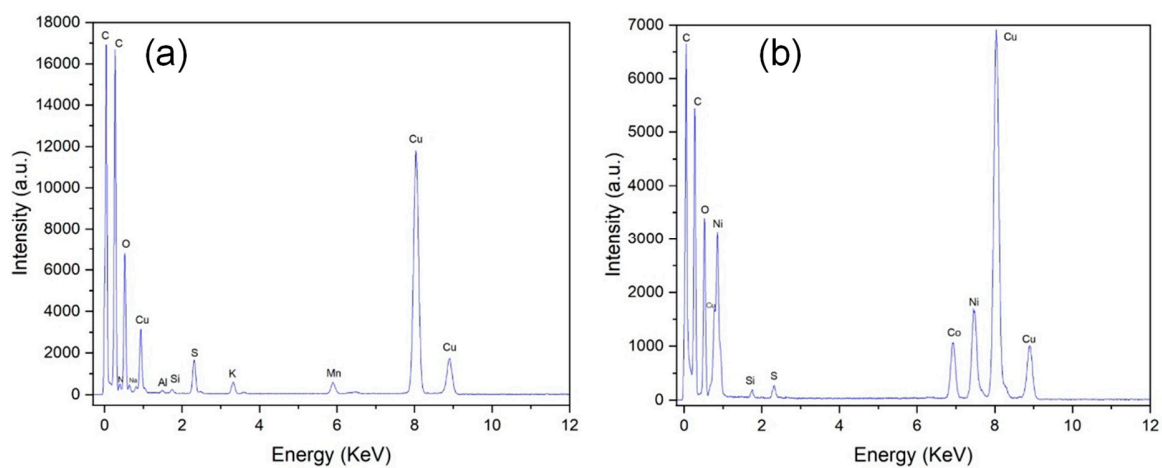

Figure S5. Energy Dispersive Spectroscopy (EDS) (A) Graphene oxide (GO) obtained from spent Zn-C batteries (B) Ni/Co-NPs-GO (60:40 w/w).

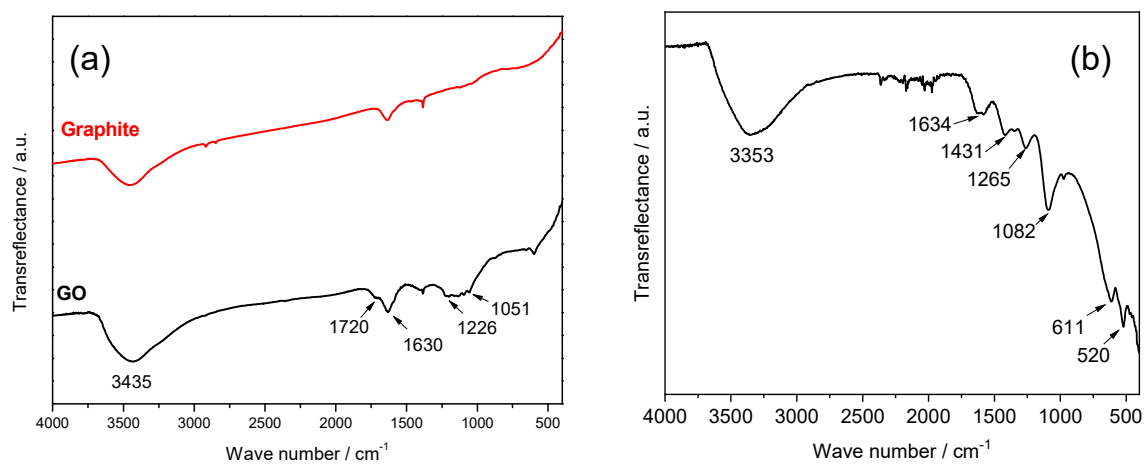

Figure S6. FTIR of (a) graphite obtained from spent Zn-C batteries (red) and graphene oxide (GO) obtained from spent Zn-C batteries (black) (b) Ni/Co-NPs-GO (60:40 w/w ).

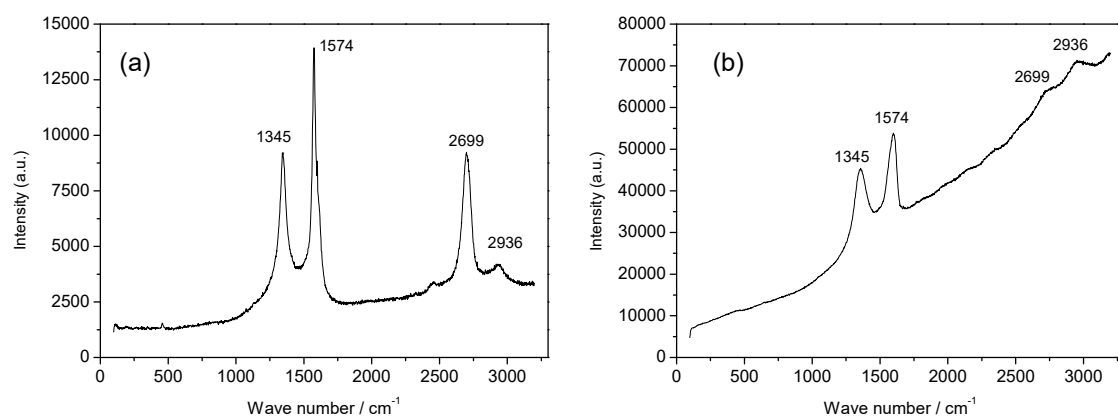

Figure S7. Raman spectroscopy. (a) graphite obtained from spent Zn-C batteries (b) graphene oxide (GO) obtained from spent Zn-C batteries.

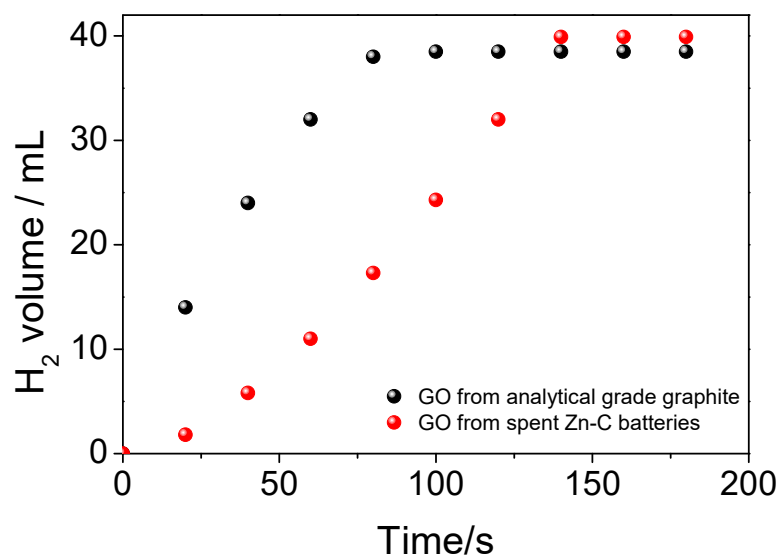

Figure S8. Hydrogen evolution from NaBH<sub>4</sub> mediated by Ni/Co-GO NPs. Reaction conditions: 0.700 mmol of Ni/Co NPs (60:40 w/w); GO support: 100 mg; 1.00 ml of NaBH<sub>4</sub> (0.500 mol L<sup>-1</sup>); Temperature: 296.15 K.
